# Supplementary material for: TaS2 nanosheet-based ultrafast response and flexible humidity sensor for multifunctional applications
Source: Royal Society of Chemistry journal article supplement (doi:10.1039/c9tc02785h), 2019-01-01
Supplement: c9tc02785h1.pdf [file c9tc02785h1.pdf]

# TaS<sub>2</sub> nanosheets-based ultrafast response and flexible humidity sensor for multifunctional applications

*Yu Feng,<sup>a</sup> Shijing Gong,<sup>a</sup> Erwei Du,<sup>a</sup> Ke Yu,<sup>a,b,\*</sup> Jie Ren,<sup>a</sup> Zhenguo Wang<sup>a</sup> and Ziqiang Zhu<sup>a</sup>*

<sup>a</sup> Key Laboratory of Polar Materials and Devices (Ministry of Education of China), Department of Optoelectronics, East China Normal University, Shanghai 200241, China.

<sup>b</sup> Collaborative Innovation Center of Extreme Optics, Shanxi University, Taiyuan, Shanxi 030006, China.

\* Corresponding author. E-mail: yk5188@263.net. Tel: +86-21-54345198;

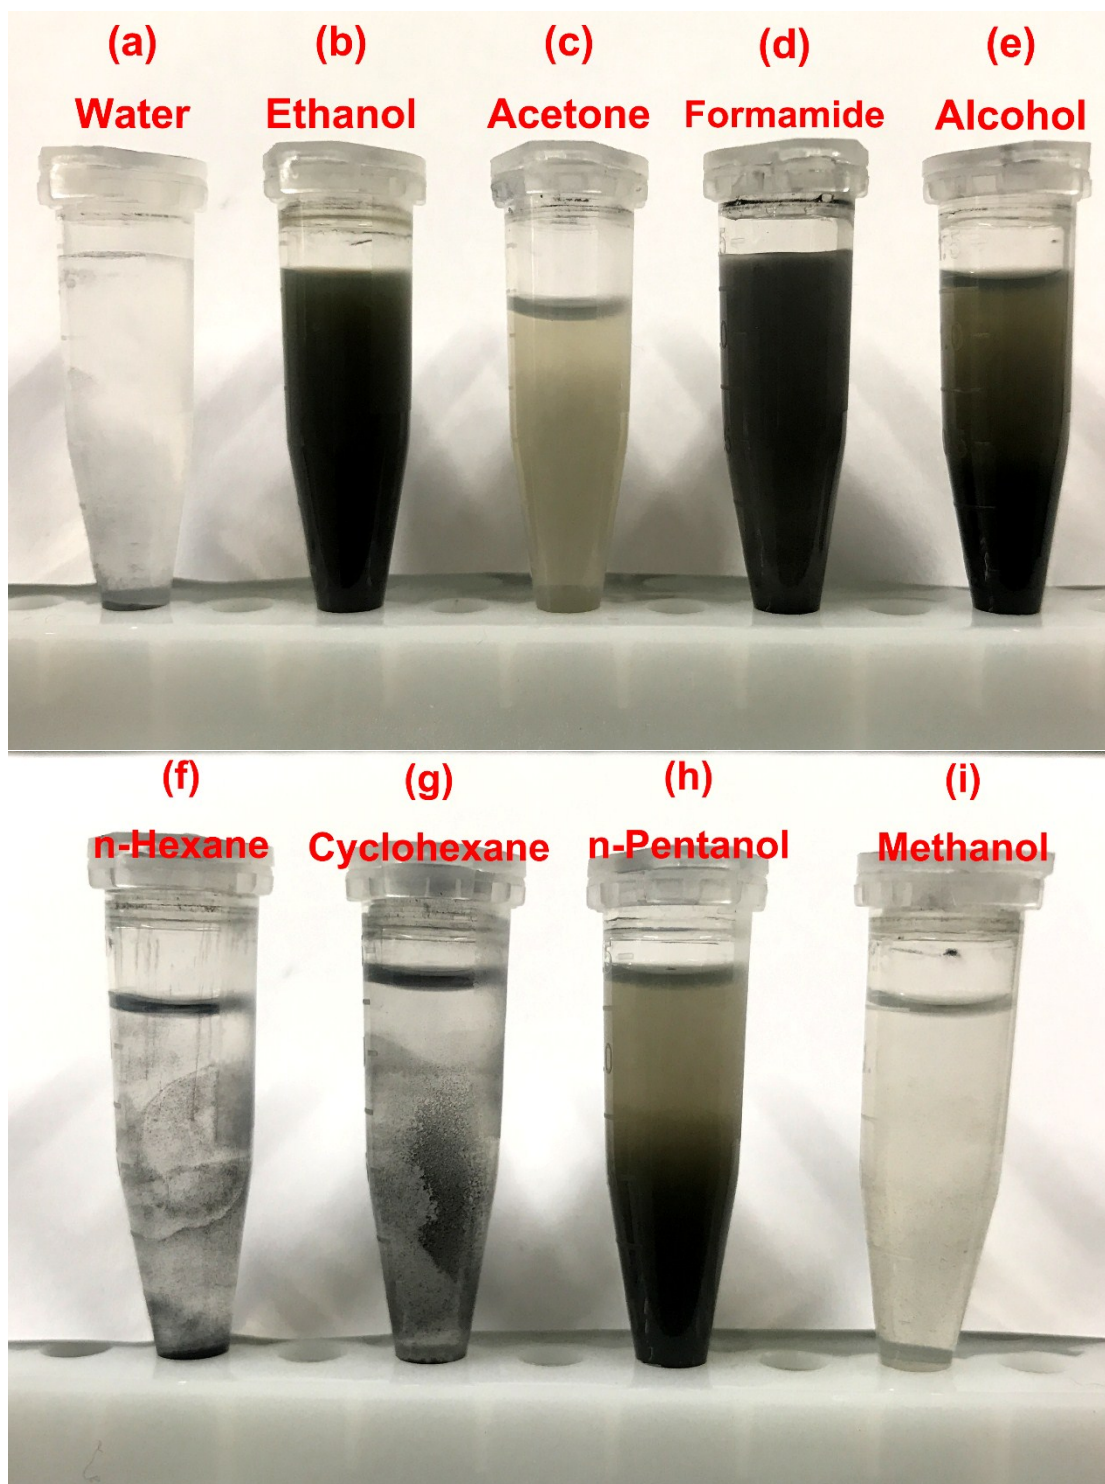

**Figure S1. Comparison of the exfoliation efficiency between various solvents.**

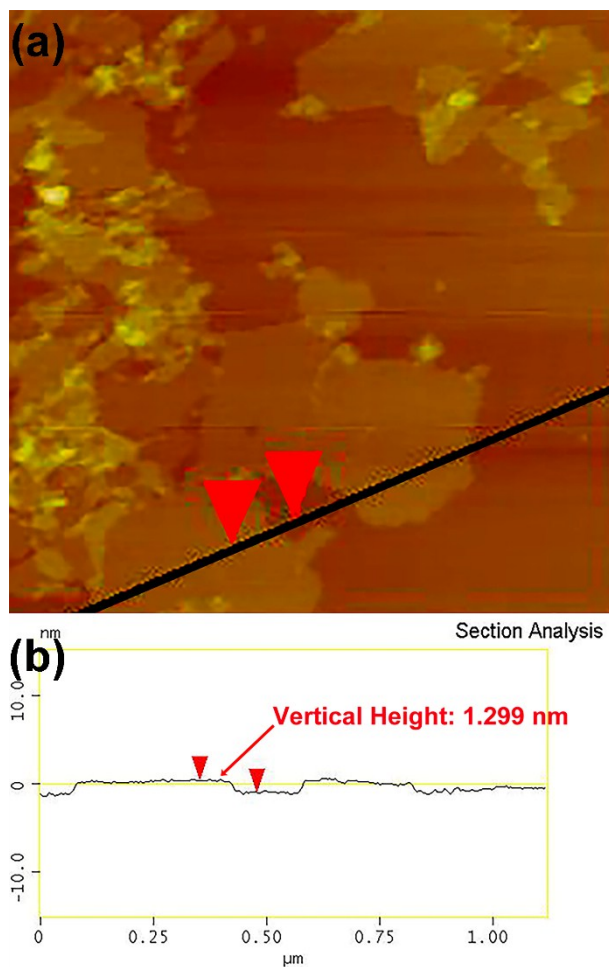

**Figure S2. (a) AFM image of TaS<sub>2</sub> nanosheets. (b) The height profile along the marked line in part (a).**

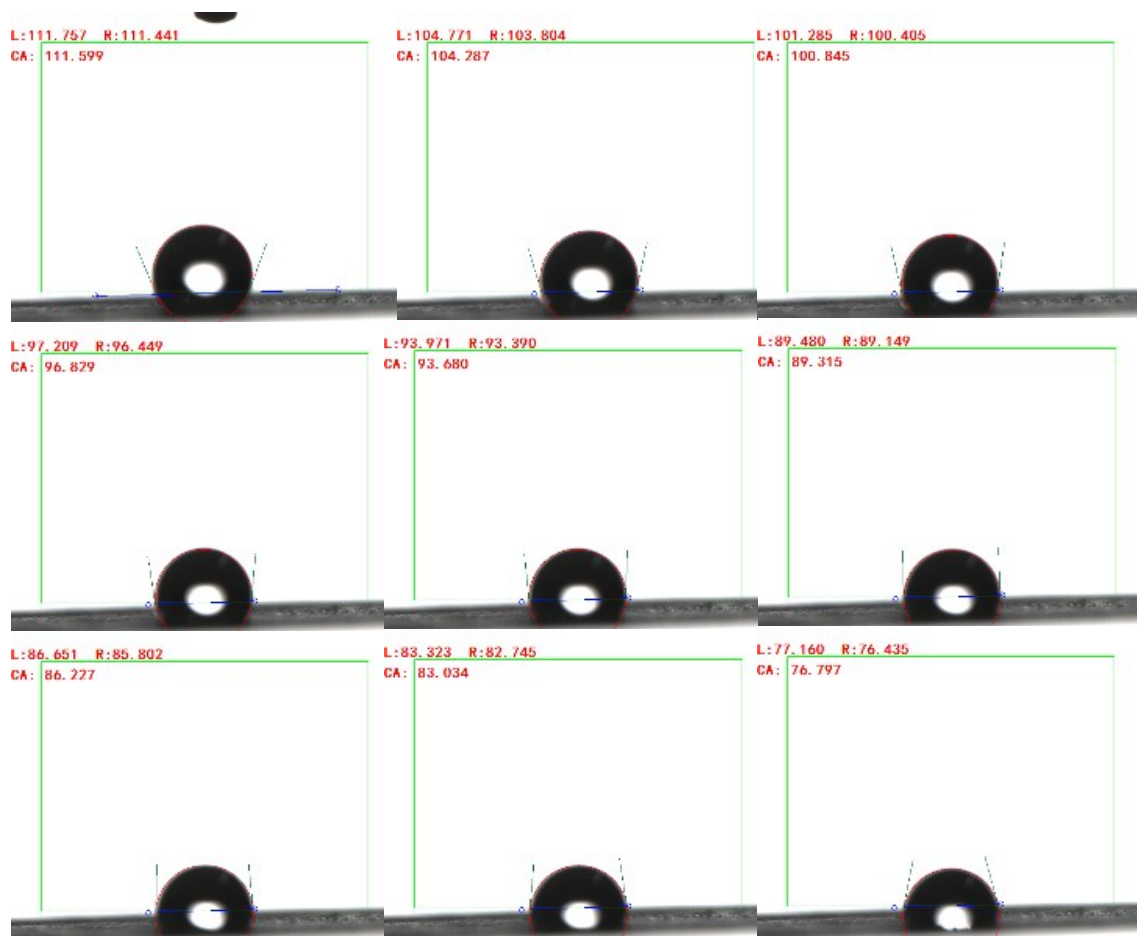

**Figure S3. The change process of the contact angle of PET interdigital electrode.**

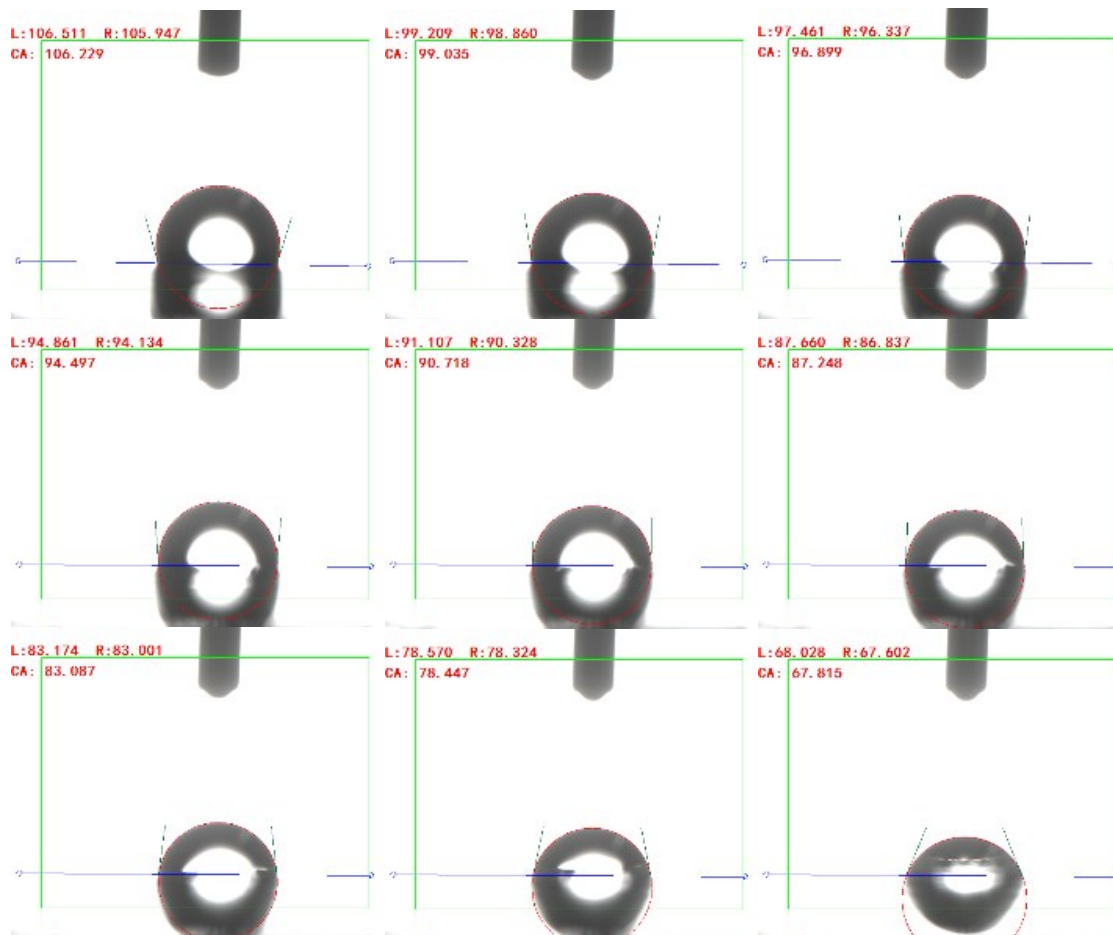

**Figure S4. The change process of the contact angle of ceramic interdigital electrode.**

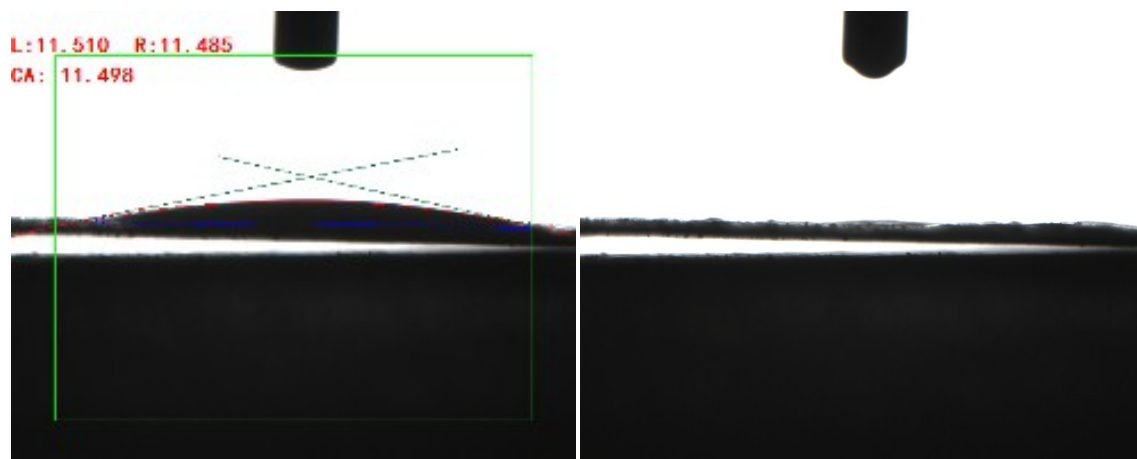

**Figure S5. The change process of the contact angle of TaS<sub>2</sub> nanosheets humidity sensor based on PET with 50% sample adhesion rate.**

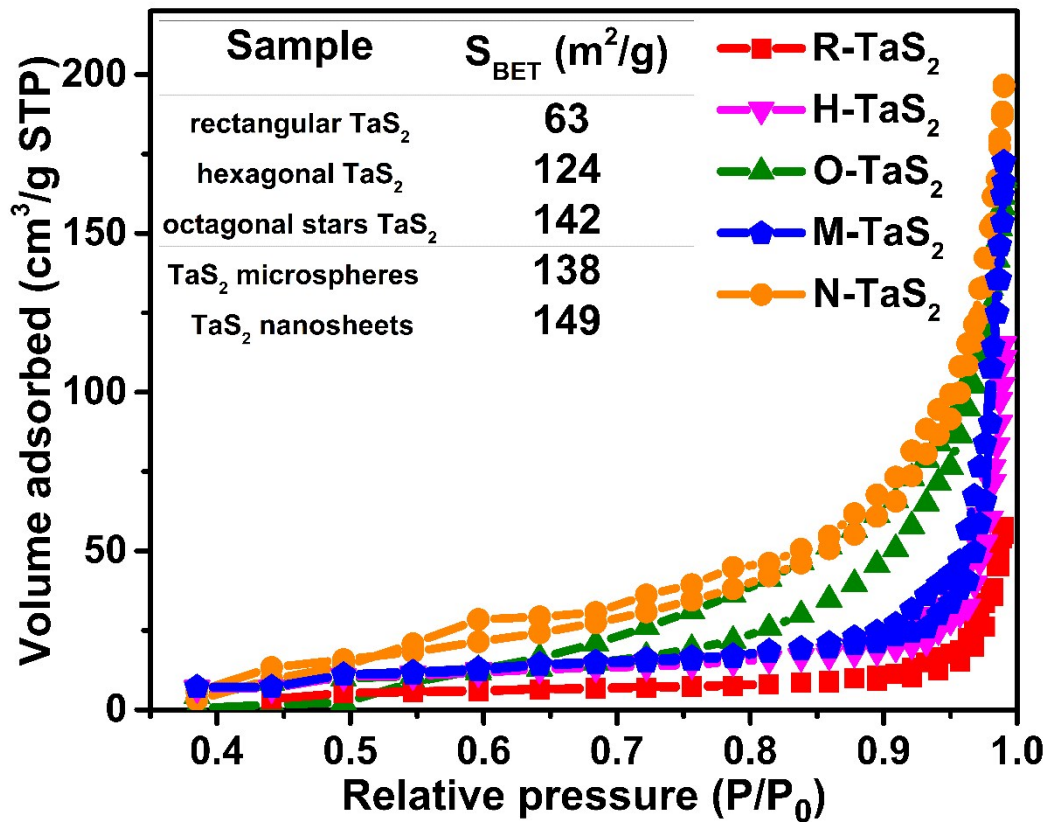

Figure S6.  $\text{N}_2$  adsorption–desorption isotherms of R- $\text{TaS}_2$  (rectangular  $\text{TaS}_2$ ), H- $\text{TaS}_2$  (hexagonal  $\text{TaS}_2$ ), O- $\text{TaS}_2$  (octagonal stars  $\text{TaS}_2$ ), M- $\text{TaS}_2$  ( $\text{TaS}_2$  microspheres), and N- $\text{TaS}_2$  ( $\text{TaS}_2$  nanosheets).

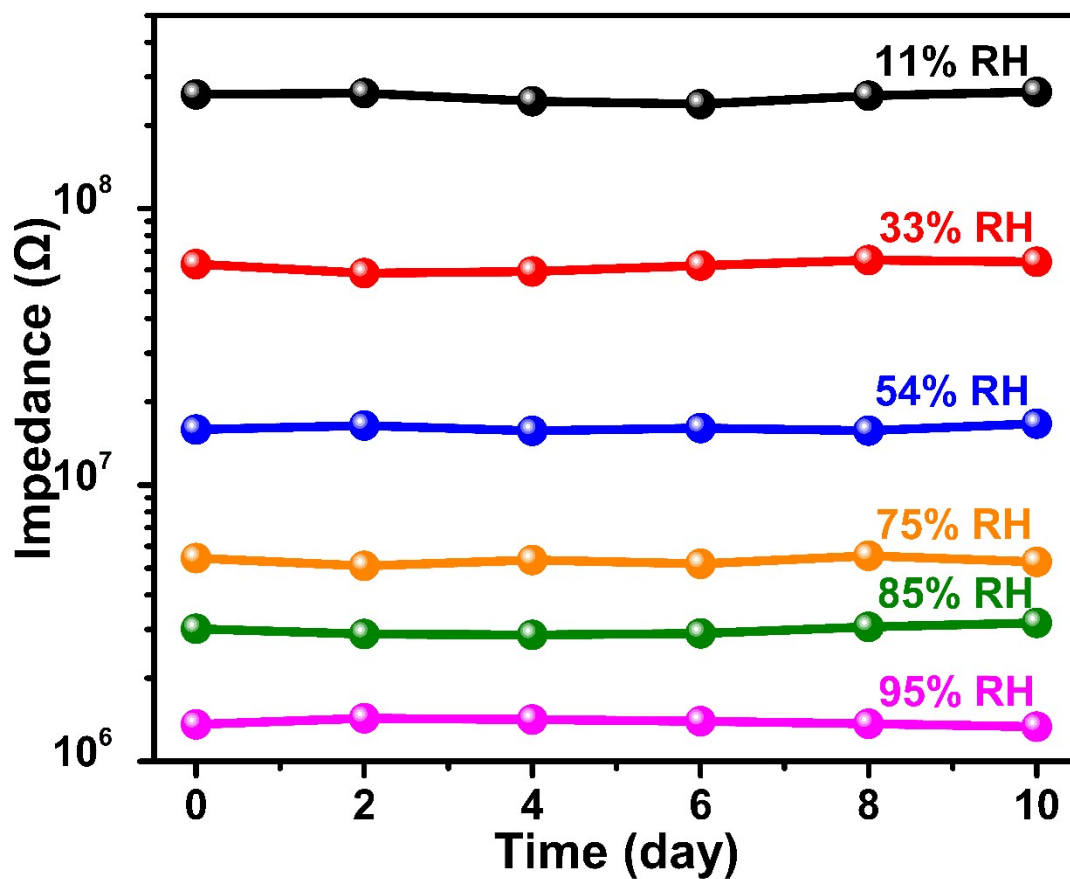

Figure S7. The response of TaS<sub>2</sub> nanosheets sensor monitored at different humidity conditions for 10 days.



**Table S1. Comparison of TaS<sub>2</sub> based humidity sensor with other humidity sensors reported.**

| <b>Material</b>                   | <b>RH range (%)</b>     | <b>Order of impedance change</b> | <b>Sensitivity (%)</b>     | <b>Hysteresis (%)</b> | <b>Response Time (s)</b> | <b>Recovery Time (s)</b> | <b>Reference</b> |
|-----------------------------------|-------------------------|----------------------------------|----------------------------|-----------------------|--------------------------|--------------------------|------------------|
| <b>Black Phosphorus</b>           | 11-97                   | 3-4                              | 507825 ( $\Delta C/C$ )    | -                     | 4.7                      | 3                        | S1               |
| <b>MoS<sub>2</sub></b>            | 0-35                    | 2                                | 10 <sup>4</sup>            | -                     | 10                       | 60                       | S2               |
| <b>VS<sub>2</sub></b>             | 0-100                   | 1                                | 30 ( $R_{RH}/R_{dry}$ )    | -                     | 40                       | 50                       | S3               |
| <b>WS<sub>2</sub></b>             | 11-97                   | 1                                | 469                        | -                     | 12                       | 13                       | S4               |
| <b>Graphene</b>                   | 50.0-70.6,<br>79.5-85.0 | -                                | -0.224, -4.118<br>(dB/%RH) | -                     | 4                        | 23.7                     | S5               |
| <b>Graphene oxide</b>             | 10-90                   | -                                | -                          | -                     | 0.03                     | 0.03                     | S6               |
| <b>TaS<sub>2</sub> nanosheets</b> | 11-95                   | 2                                | 201.9 ( $\Delta R/R$ )     | 0.02 (75% RH)         | 0.6                      | 2                        | This work        |

## References

- S1. P. He, J. R. Brent, H. Ding, J. Yang, D. J. Lewis, P. O'Brien and B. Derby, *Nanoscale*, 2018, **10**, 5599-5606.
- S2. J. Zhao, N. Li, H. Yu, Z. Wei, M. Liao, P. Chen, S. Wang, D. Shi, Q. Sun and G. Zhang, *Adv Mater*, 2017, **29**.
- S3. J. Feng, L. Peng, C. Wu, X. Sun, S. Hu, C. Lin, J. Dai, J. Yang and Y. Xie, *Adv Mater*, 2012, **24**, 1969-1974.
- S4. A. S. Pawbake, R. G. Waykar, D. J. Late and S. R. Jadkar, *Acs Appl Mater Inter*, 2016, **8**, 3359-3365.
- S5. Z. Xing, Y. Zheng, Z. Yan, Y. Feng, Y. Xiao, J. Yu, H. Guan, Y. Luo, Z. Wang, Y. Zhong and Z. Chen, *Sensors and Actuators B: Chemical*, 2019, **281**, 953-959.
- S6. S. Borini, R. White, D. Wei, M. Astley, S. Haque, E. Spigone, N. Harris, J. Kivioja and T. Ryhanen, *ACS Nano*, 2013, **7**, 11166-11173.
